# Supplementary material for: Rational Design of Cost-Effective 4-Styrylcoumarin Fluorescent Derivatives for Biomolecule Labeling
Source: MDPI journal article supplement (doi:10.3390/molecules28196822), 2023-09-27
Supplement: s1 [file s1]

## Supplementary materials

### Rational design of cost-effective 4-styrylcoumarin fluorescent derivatives for biomolecules labeling

Eustáquio R<sup>a</sup>, Ramalho JPP<sup>b,c</sup>, Caldeira AT<sup>a,b,d</sup>, Pereira A<sup>a,b\*</sup>

<sup>a</sup> HERCULES Laboratory & IN2PAST—Associate Laboratory for Research and Innovation in Heritage, Arts, Sustainability and Territory, University of Évora, Largo Marquês de Marialva 8, 7000-809 Évora, Portugal.

<sup>b</sup> Department of Chemistry and Biochemistry, School of Sciences and Technology, University of Évora, Rua Romão Ramalho 59, 7000-671 Évora, Portugal.

<sup>c</sup> Laqv-Requimte, University of Évora, Rua Romão Ramalho 59, 7000-671 Évora, Portugal.

<sup>d</sup> City U Macau Chair in Sustainable Heritage & Sino-Portugal Joint Laboratory of Cultural Heritage Conservation Science, University of Évora, Largo Marquês de Marialva 8, 7000-809 Évora, Portugal

\* Corresponding author.

E-mail address: amlp@uevora.pt

|                                               |           |
|-----------------------------------------------|-----------|
| <b>1. NMR spectra .....</b>                   | <b>2</b>  |
| <b>2. Mass spectra .....</b>                  | <b>11</b> |
| <b>3. Quantum chemical calculations .....</b> | <b>15</b> |

## 1. NMR spectra

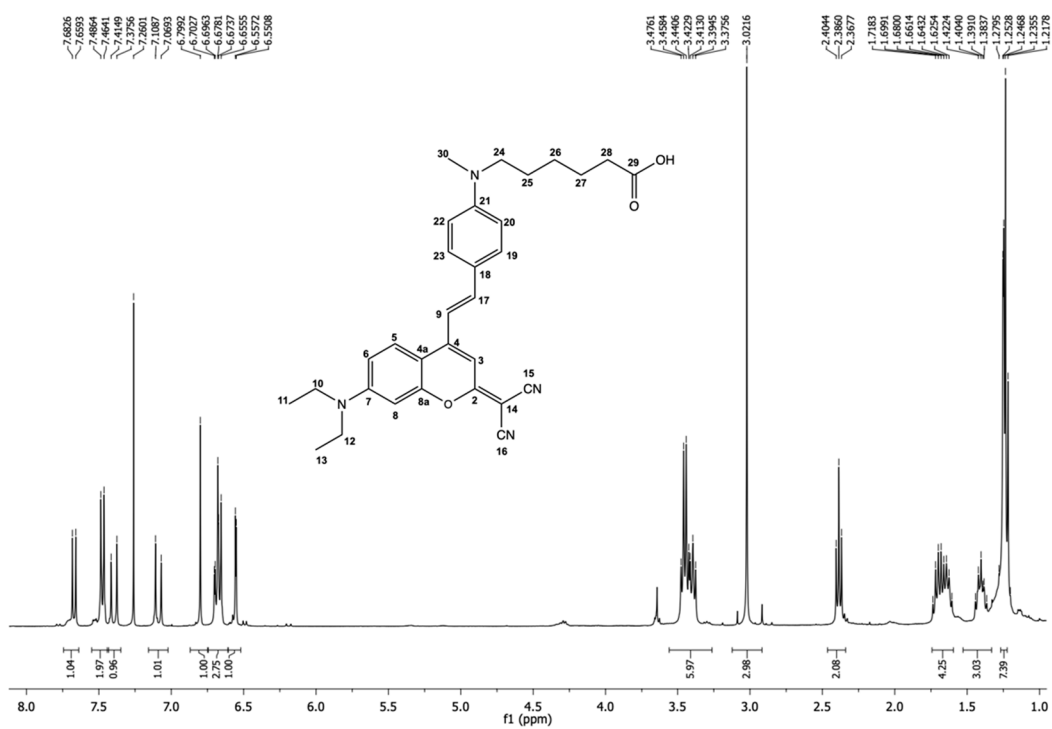

**Figure S1** <sup>1</sup>H-NMR spectrum of **7** (CDCl<sub>3</sub>, 400 MHz).

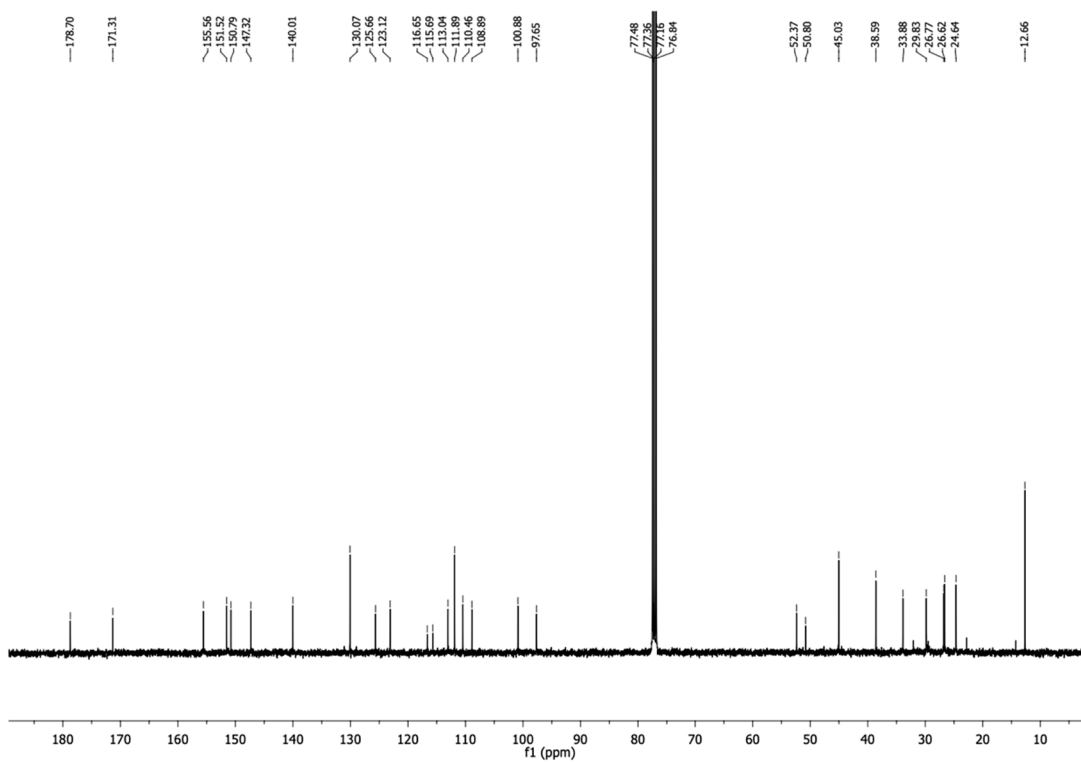

**Figure S2** <sup>13</sup>C-NMR spectrum of **7** (CDCl<sub>3</sub>, 100 MHz).

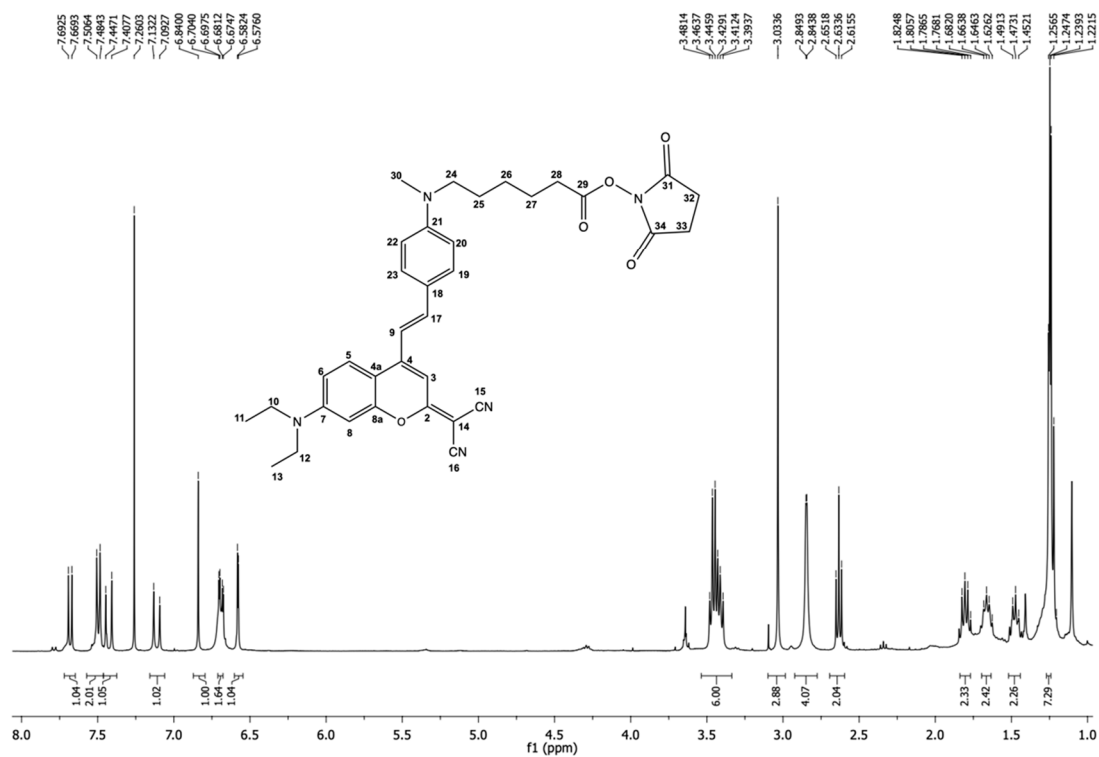

**Figure S3** <sup>1</sup>H-NMR spectrum of **9** (CDCl<sub>3</sub>, 400 MHz).

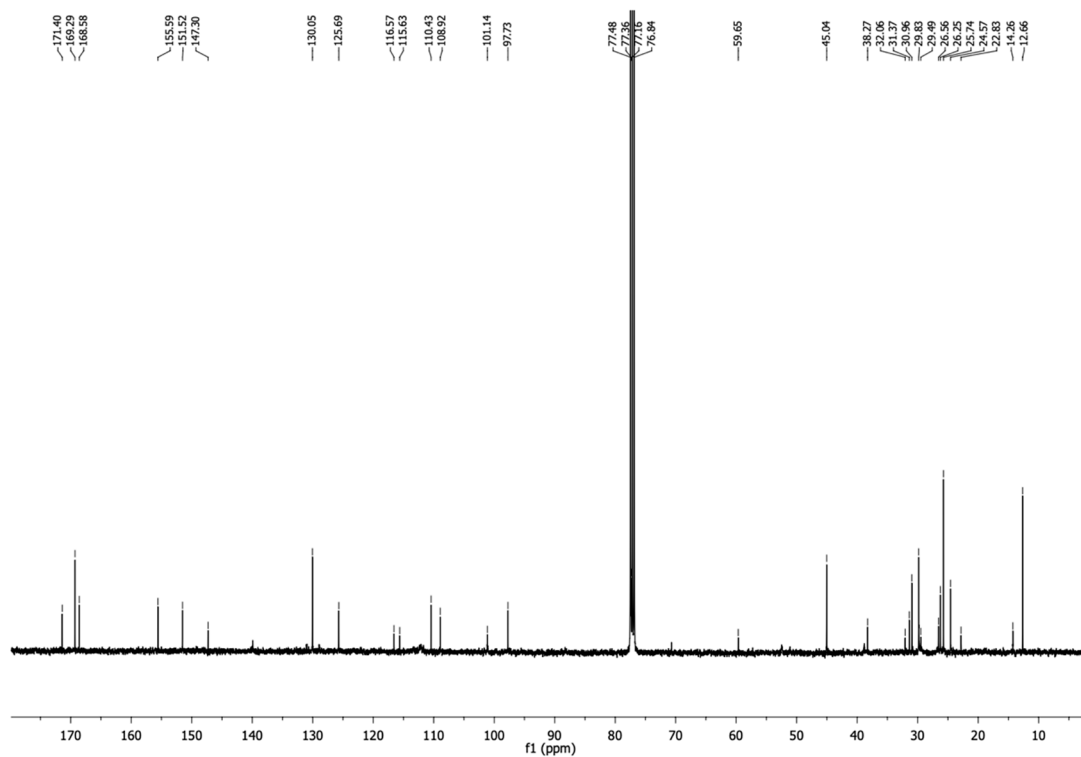

**Figure S4** <sup>13</sup>C-NMR spectrum of **9** (CDCl<sub>3</sub>, 100 MHz).

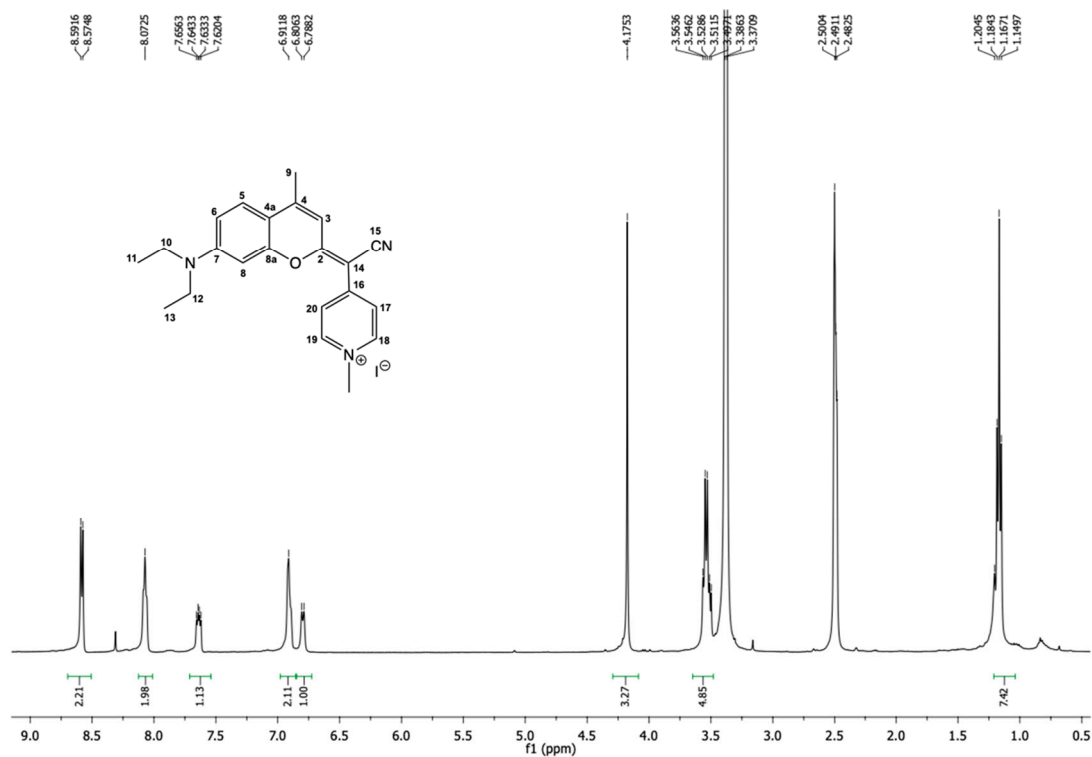

**Figure S5**  $^1\text{H}$ -NMR spectrum of **11** ( $(\text{CD}_3)_2\text{SO}$ , 400 MHz).

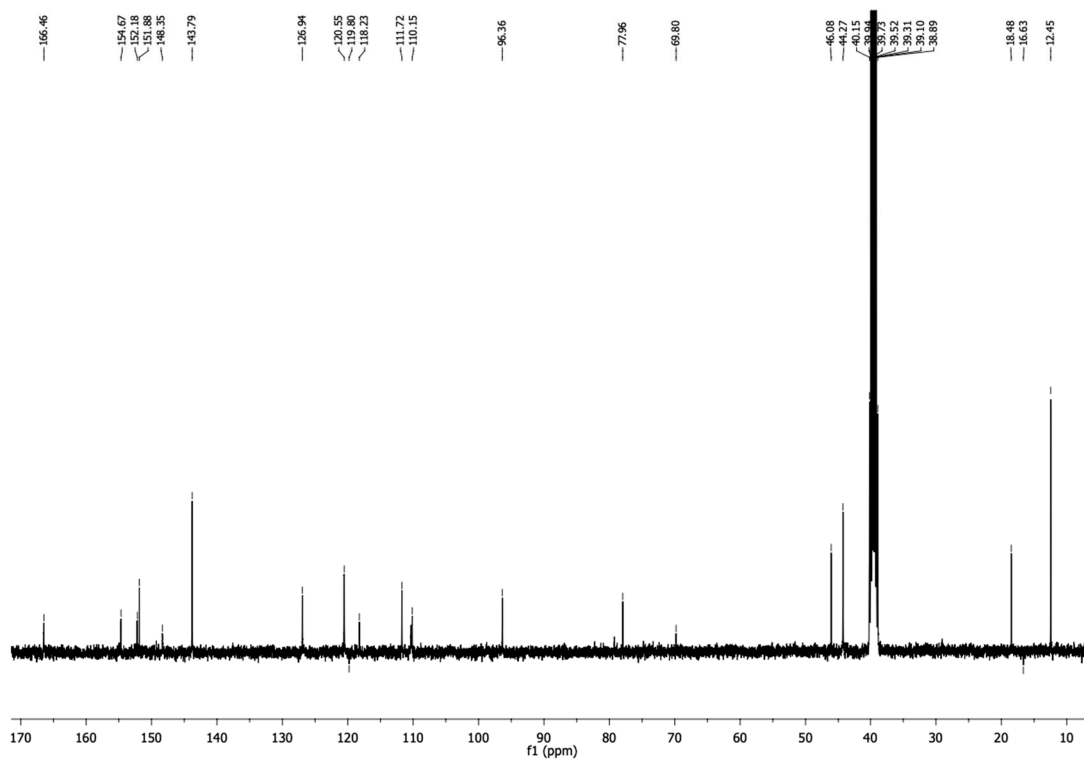

**Figure S6**  $^{13}\text{C}$ -NMR spectrum of **11** ( $(\text{CD}_3)_2\text{SO}$ , 100 MHz).

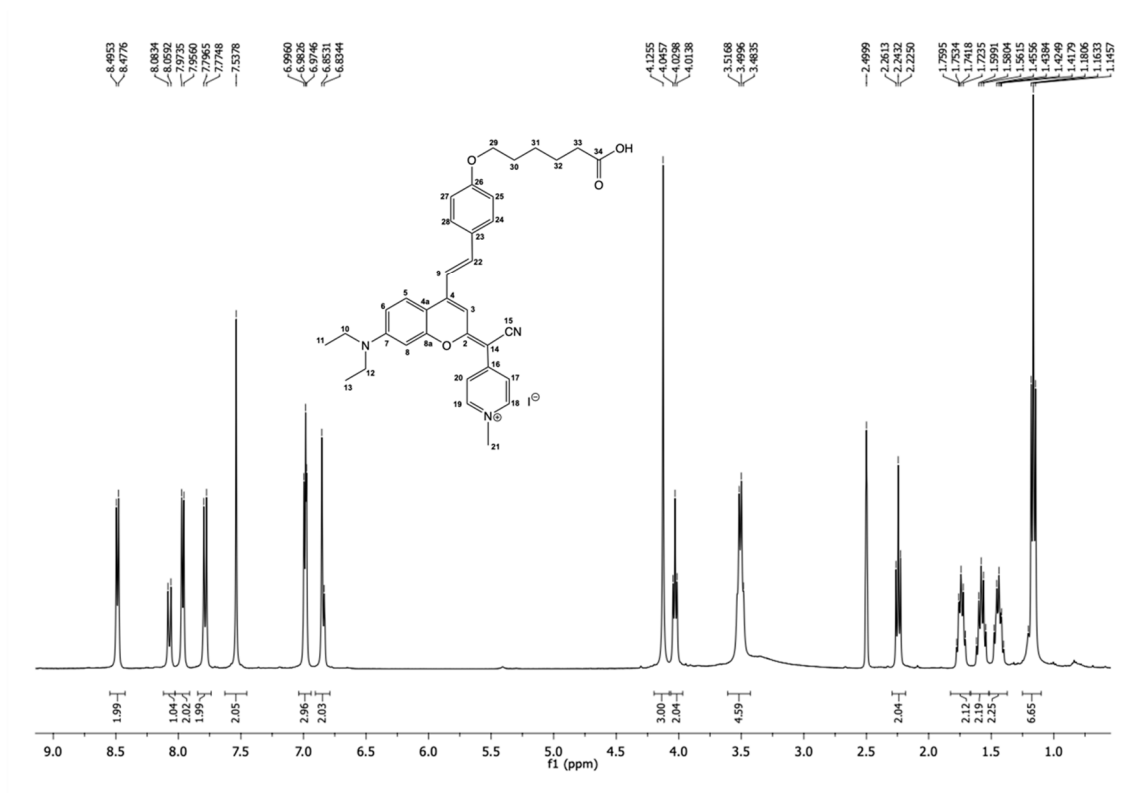

**Figure S7** <sup>1</sup>H-NMR spectrum of **12** ((CD<sub>3</sub>)<sub>2</sub>SO, 400 MHz).

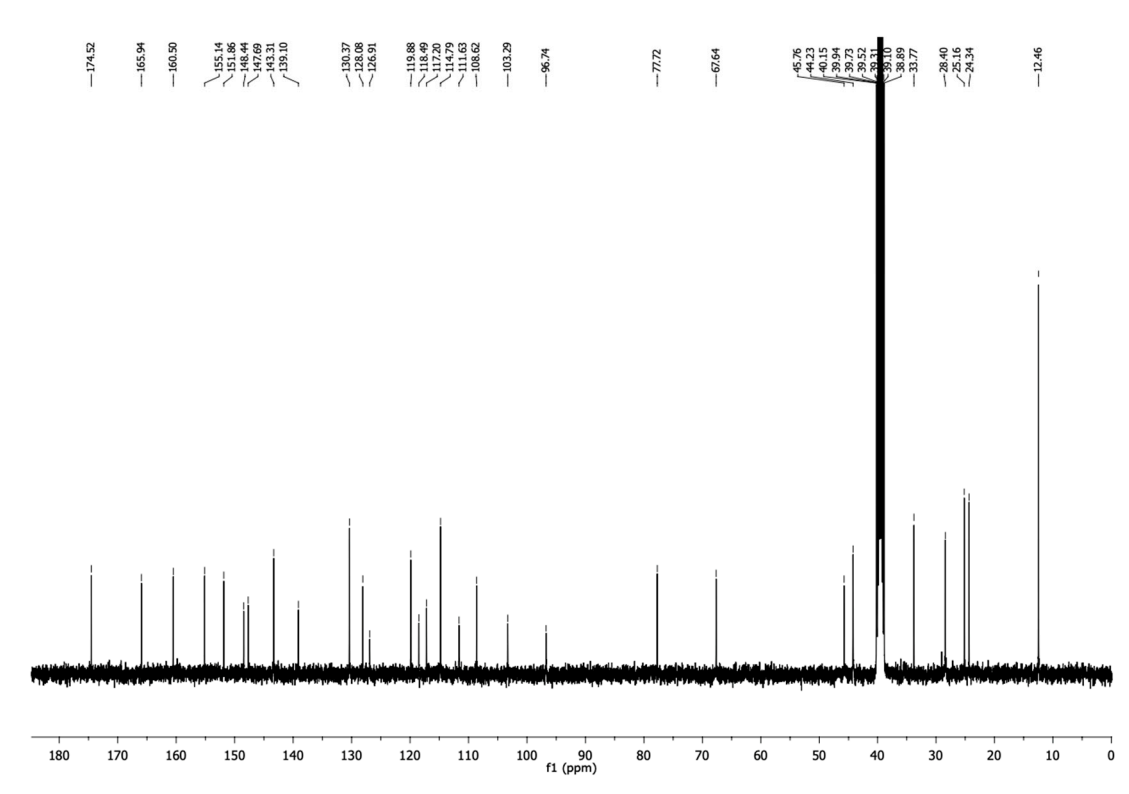

**Figure S8** <sup>13</sup>C-NMR spectrum of **12** ((CD<sub>3</sub>)<sub>2</sub>SO, 100 MHz).

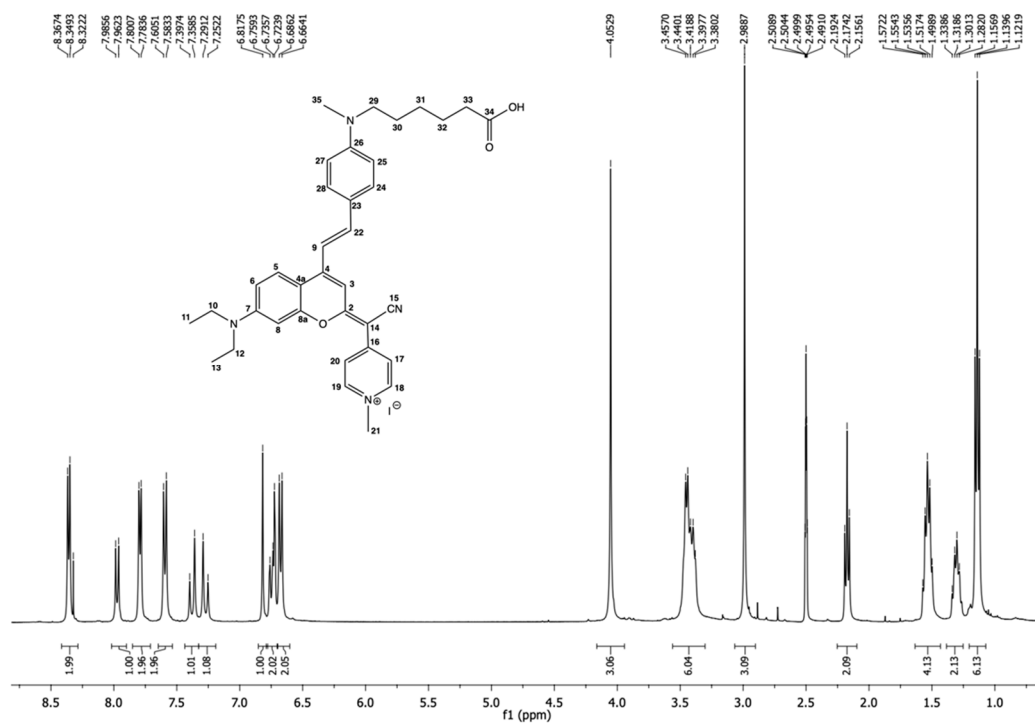

**Figure S9** <sup>1</sup>H-NMR spectrum of **13** ((CD<sub>3</sub>)<sub>2</sub>SO, 400 MHz).

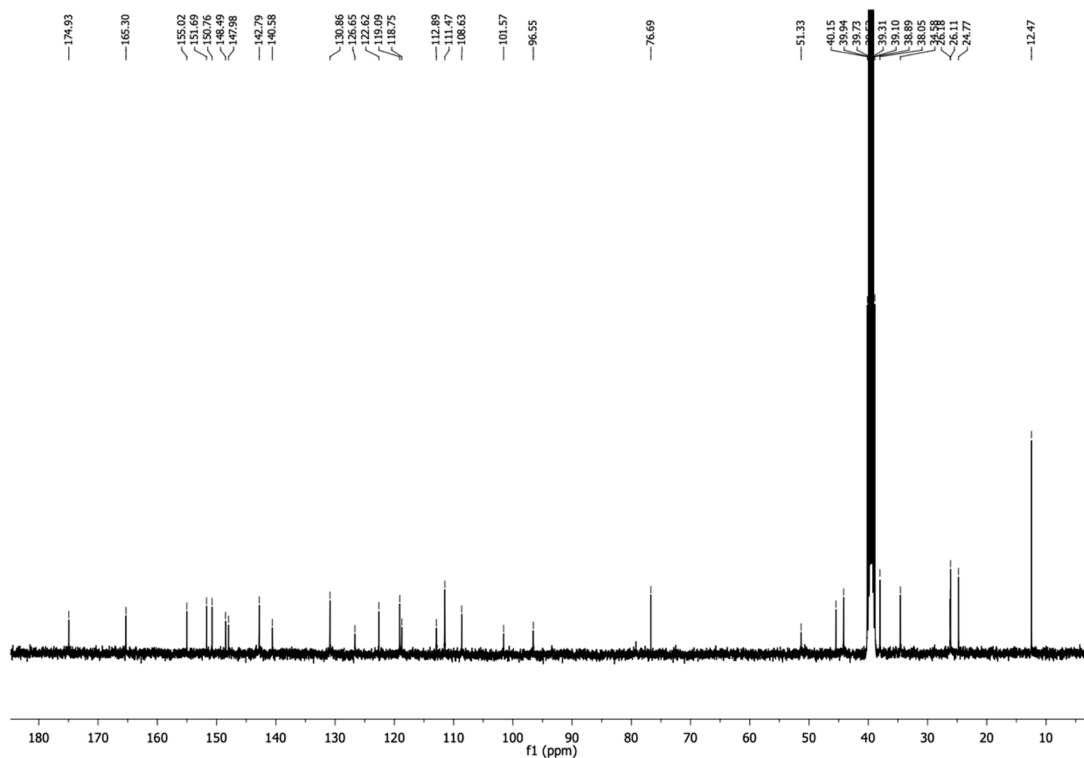

**Figure S10** <sup>13</sup>C-NMR spectrum of **13** ((CD<sub>3</sub>)<sub>2</sub>SO, 100 MHz).

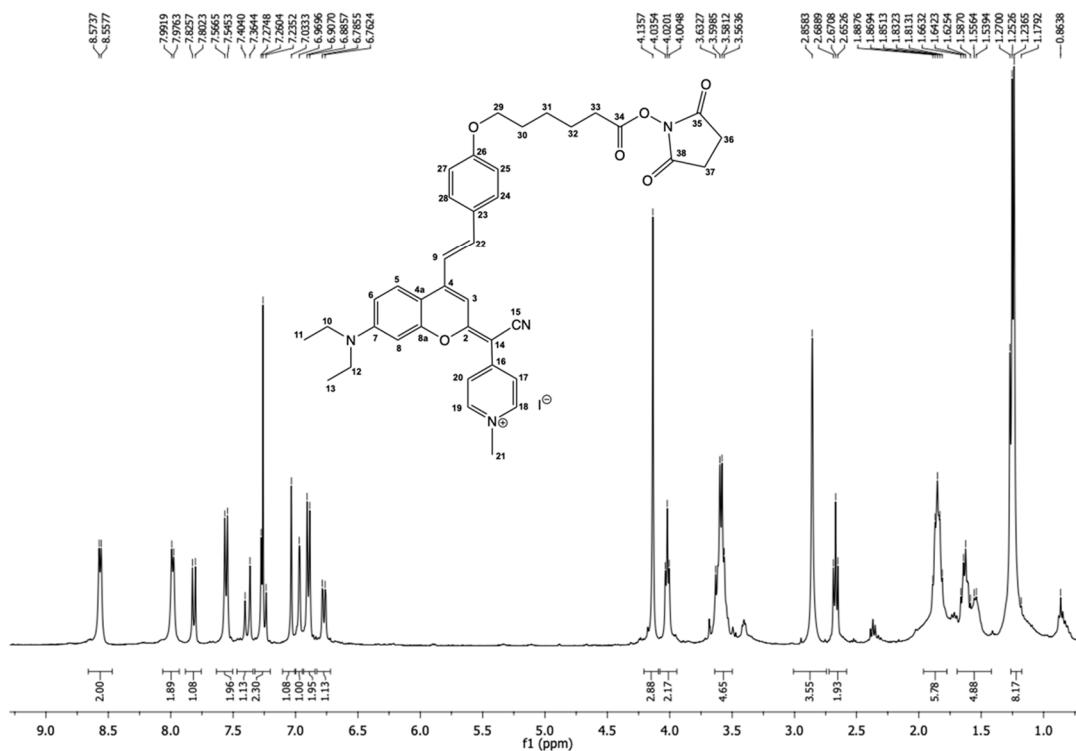

**Figure S11**  $^1\text{H}$ -NMR spectrum of **14** ( $\text{CDCl}_3$ , 400 MHz).

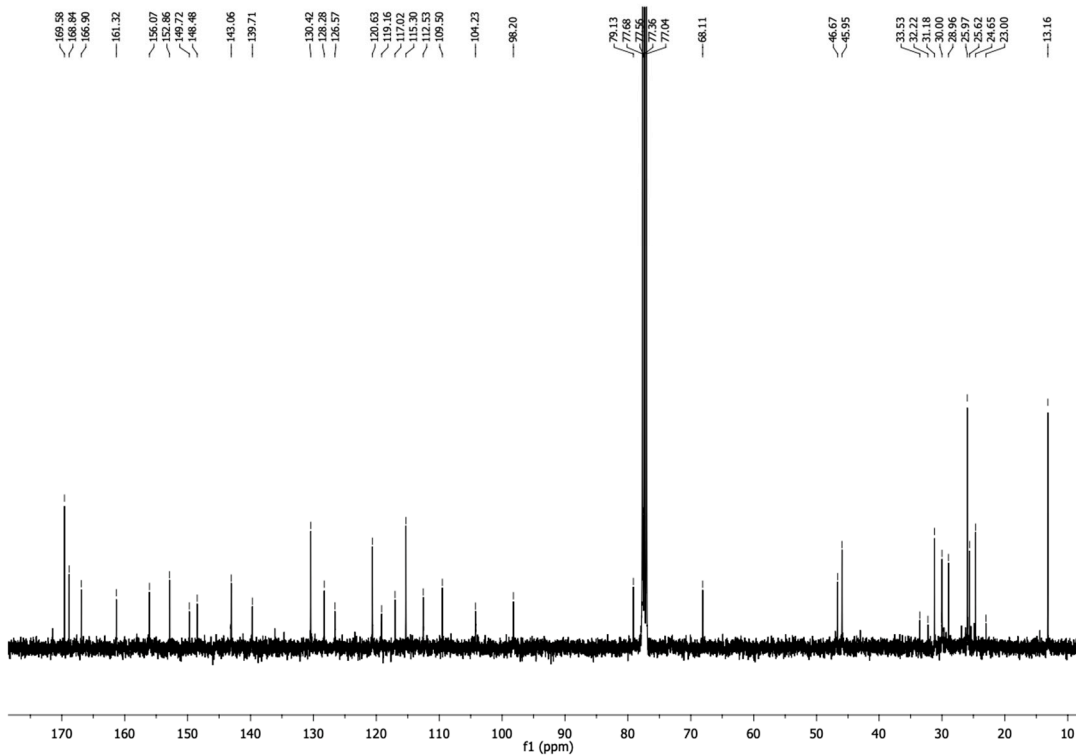

**Figure S12**  $^{13}\text{C}$ -NMR spectrum of **14** ( $\text{CDCl}_3$ , 100 MHz).

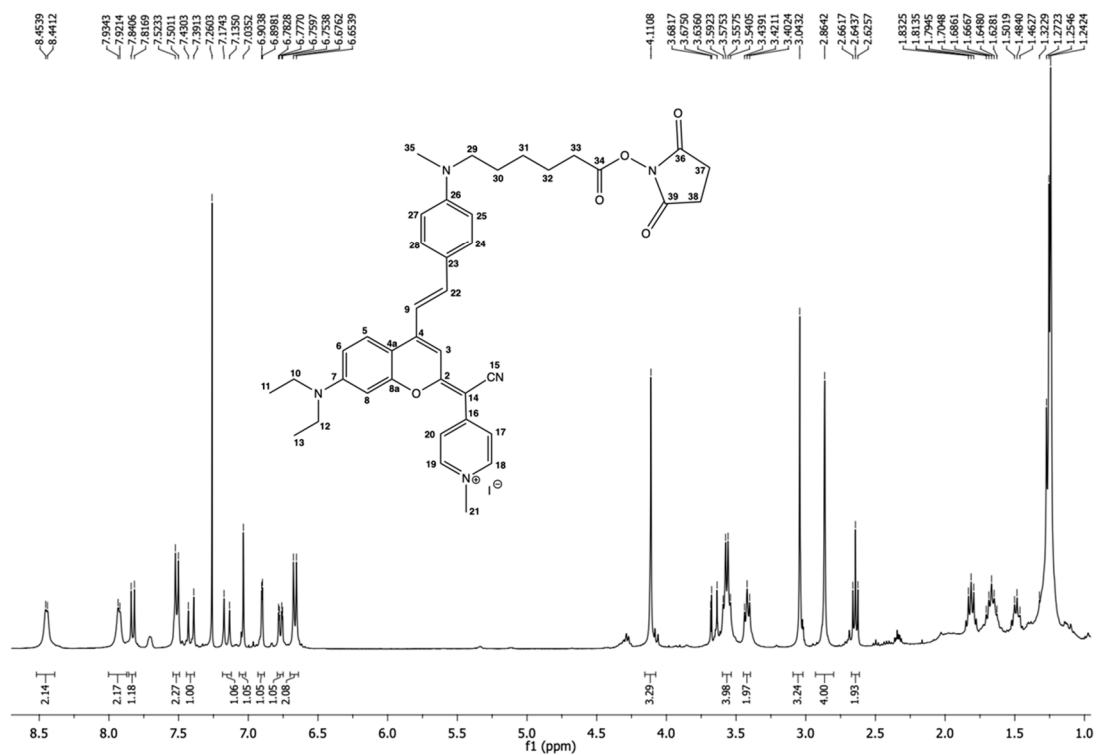

**Figure S13** <sup>1</sup>H-NMR spectrum of **15** (CDCl<sub>3</sub>, 400 MHz).

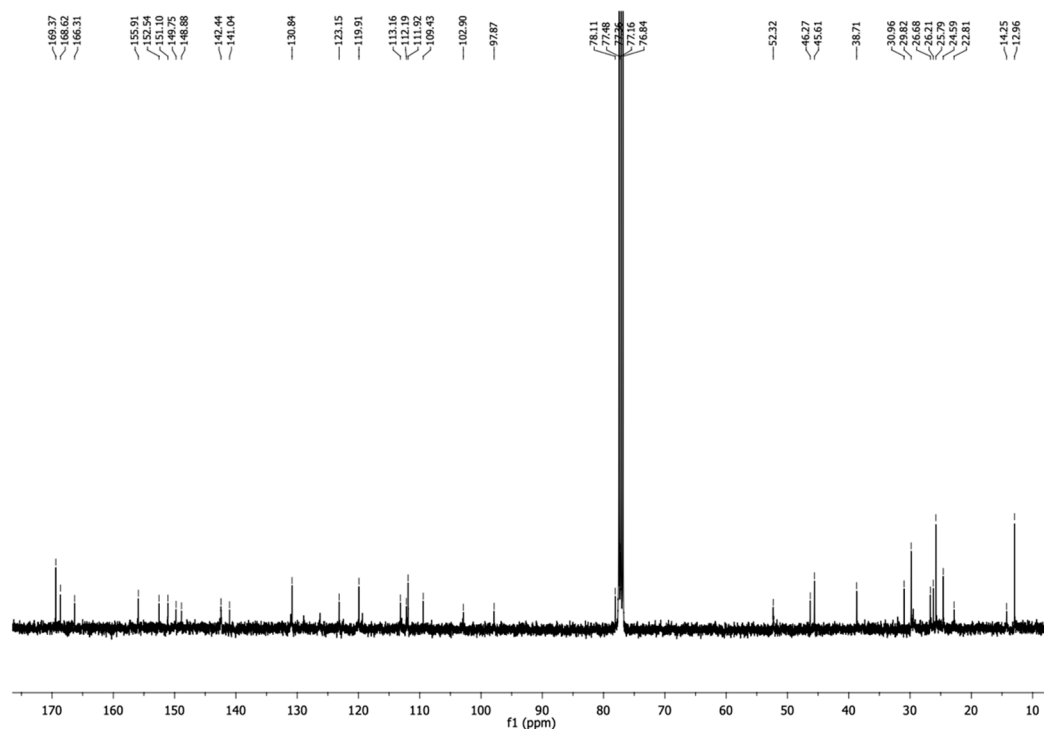

**Figure S14** <sup>13</sup>C-NMR spectrum of **15** (CDCl<sub>3</sub>, 100 MHz).



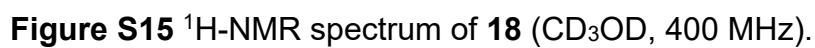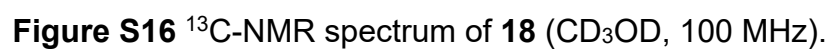

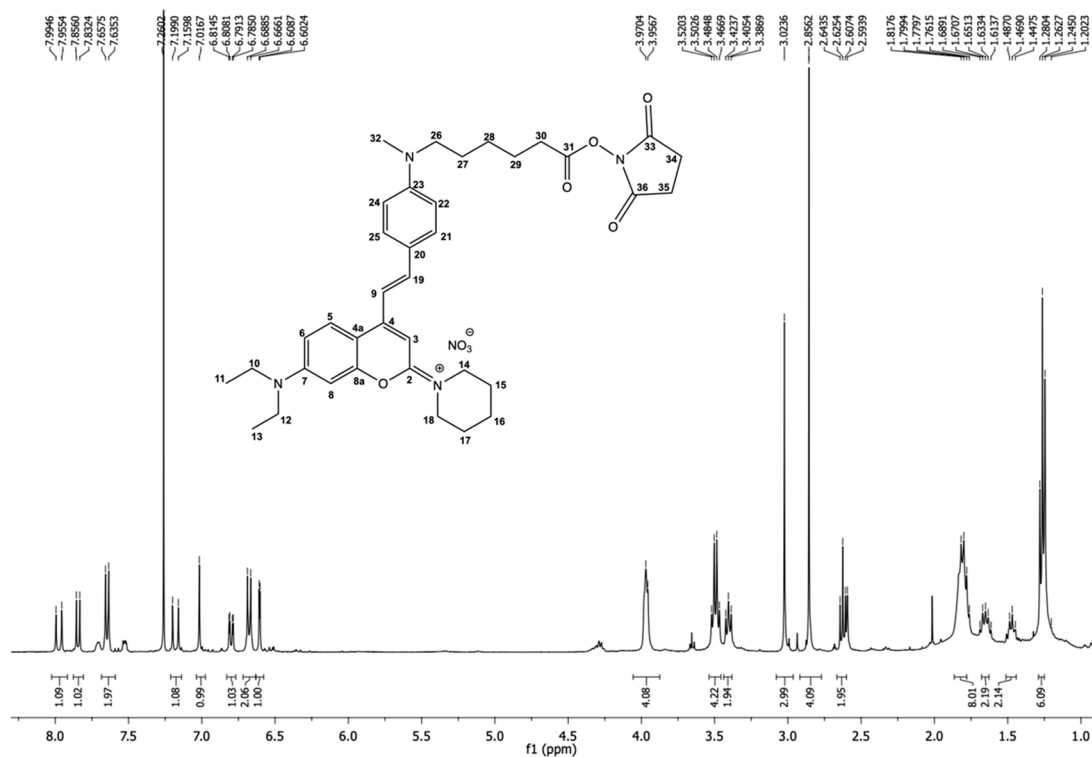

Figure S17 <sup>1</sup>H-NMR spectrum of **20** (CDCl<sub>3</sub>, 400 MHz).

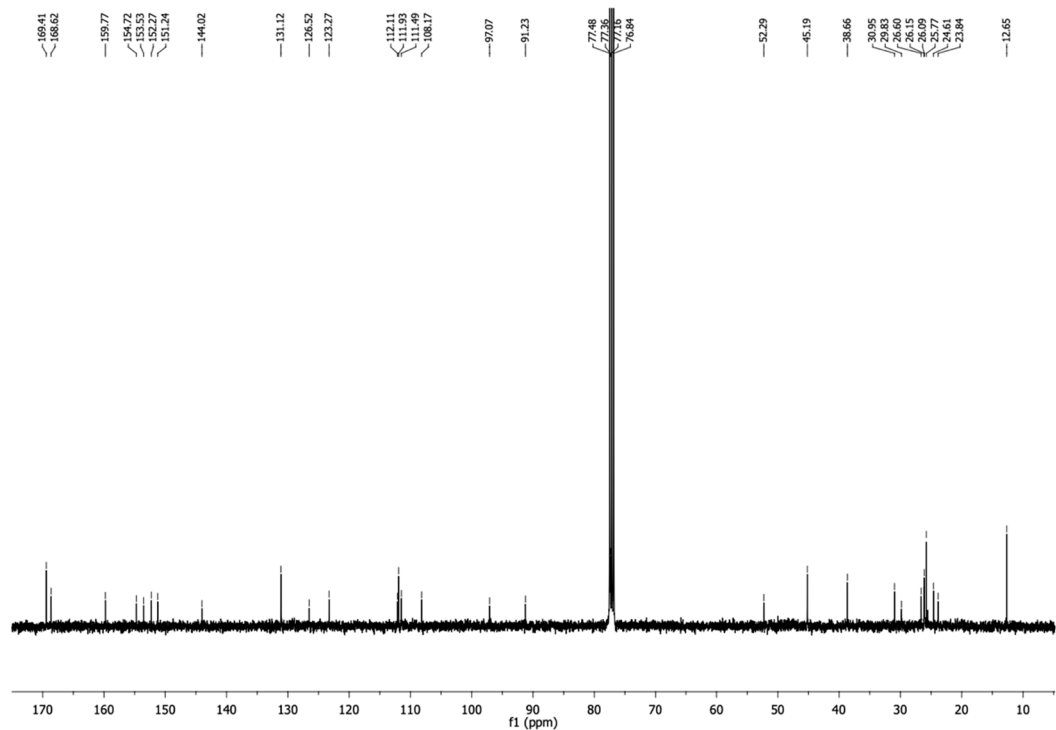

Figure S18 <sup>13</sup>C-NMR spectrum of **20** (CDCl<sub>3</sub>, 100 MHz).

## 2. Mass spectra

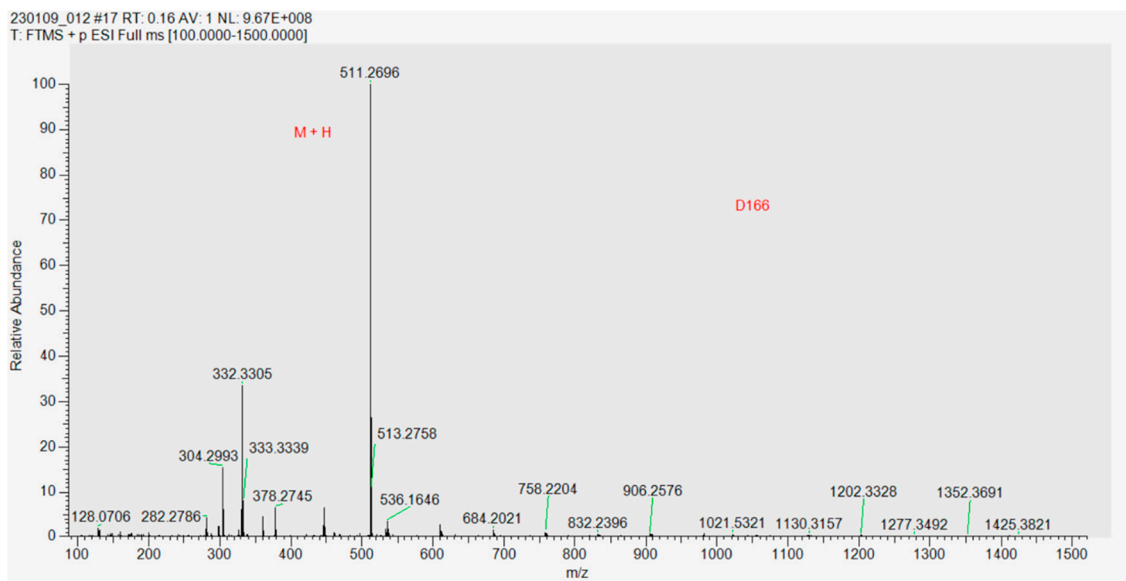

Figure S19 Mass spectrum of 7.

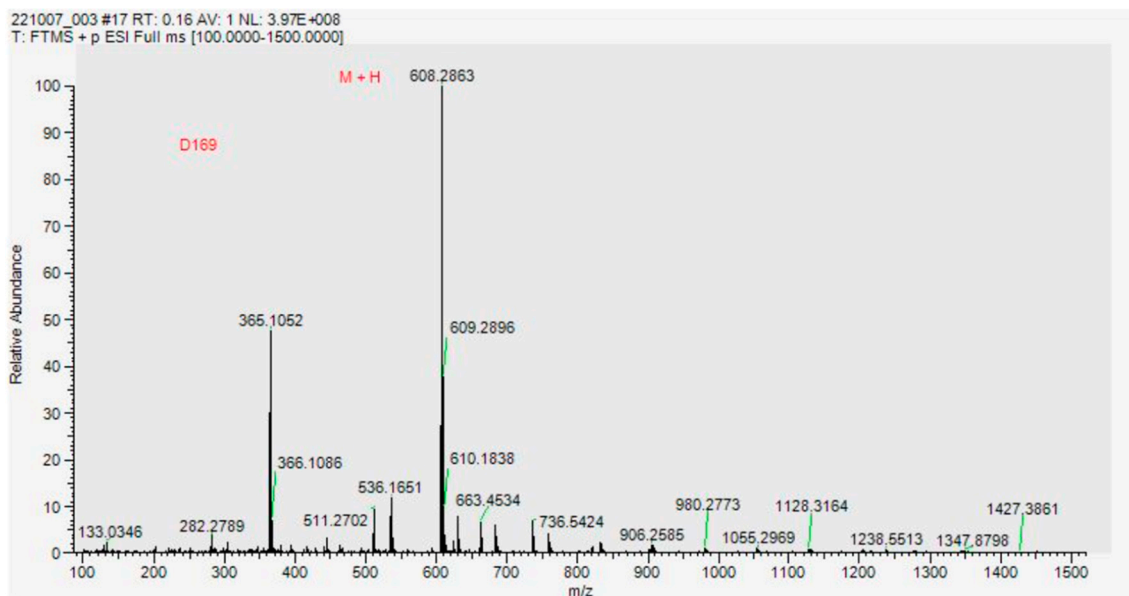

Figure S20 Mass spectrum of 9.

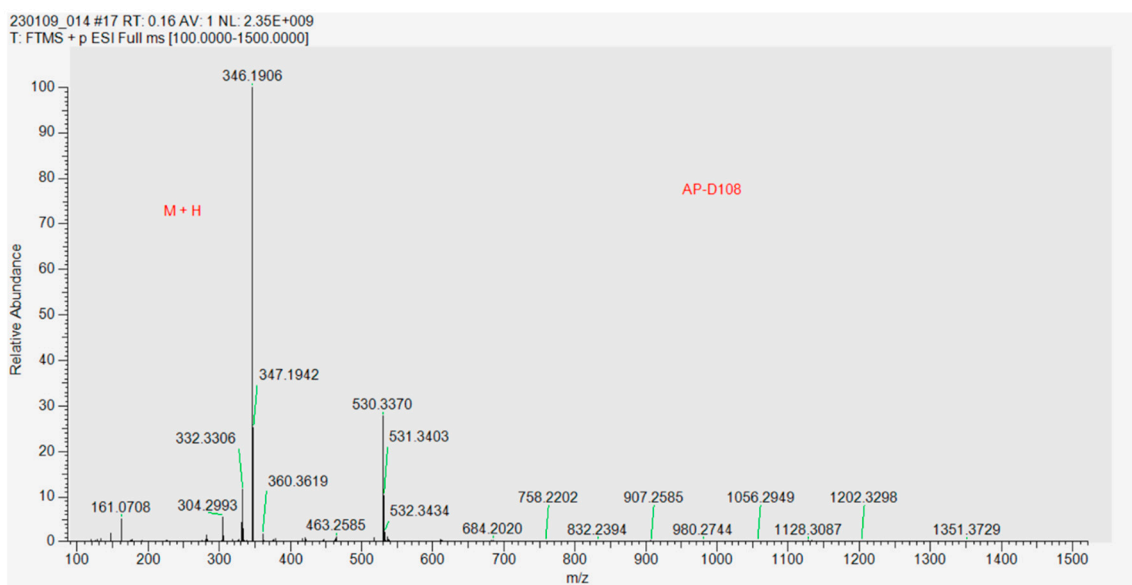

Figure S21 Mass spectrum of 11.

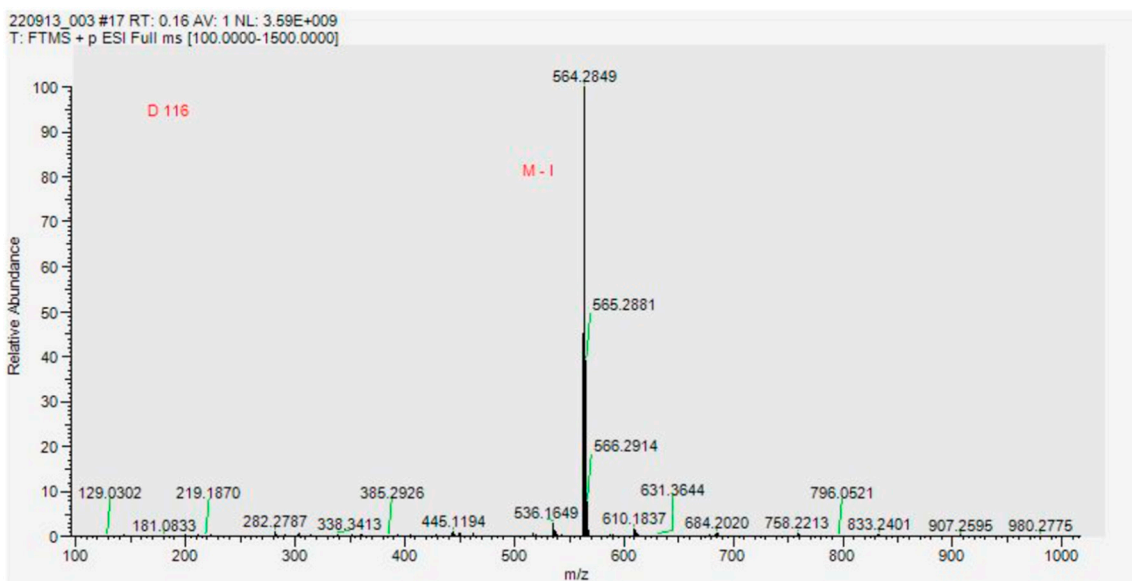

Figure S22 Mass spectrum of 12.

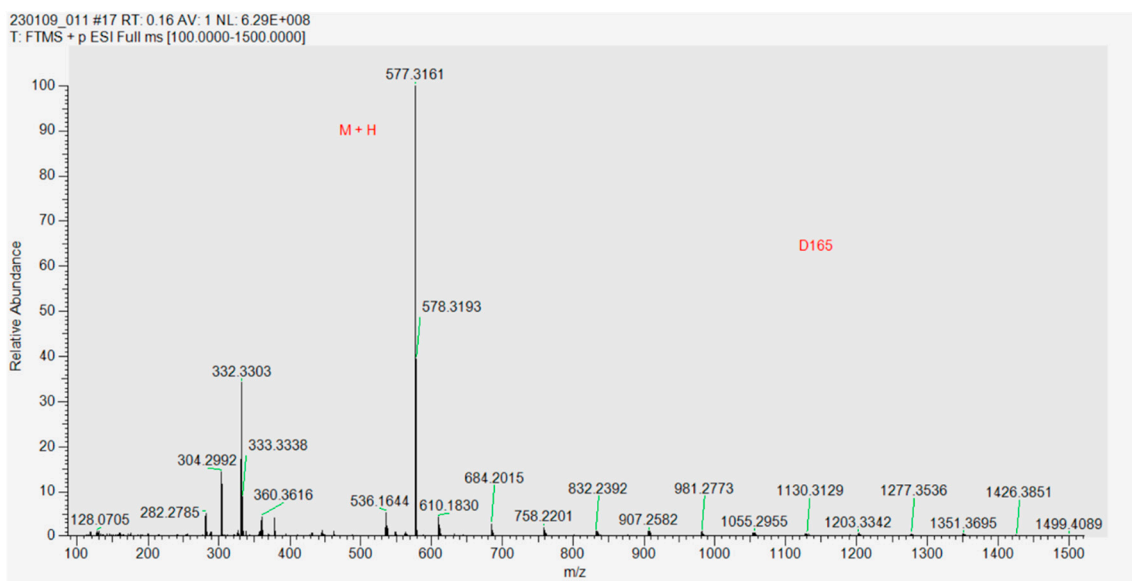

Figure S23 Mass spectrum of **13**.

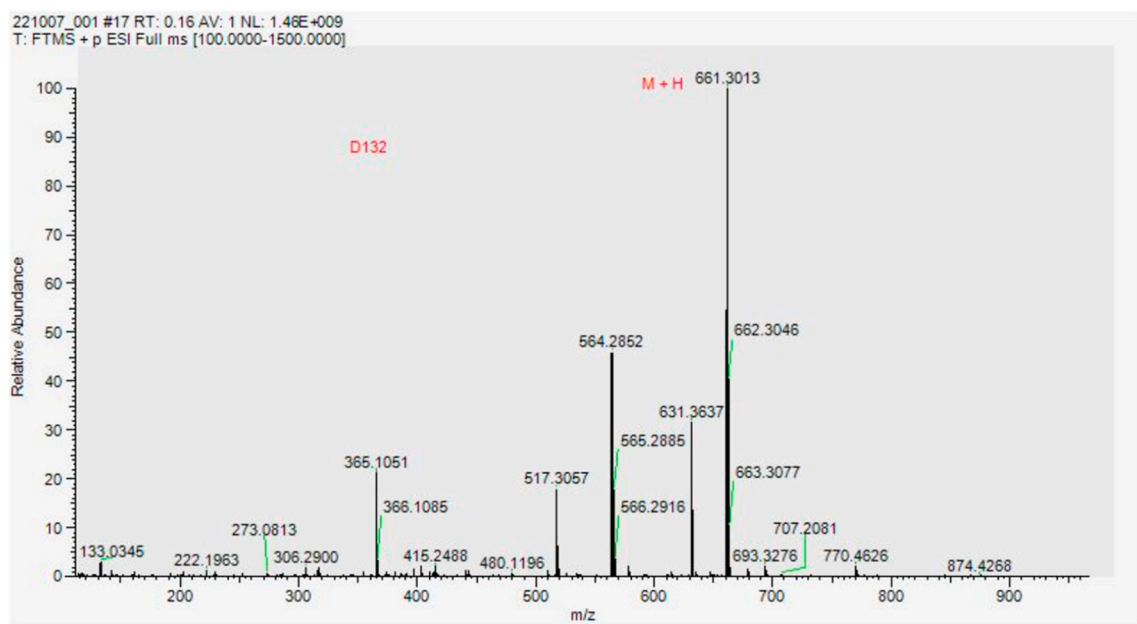

Figure S24 Mass spectrum of **14**.

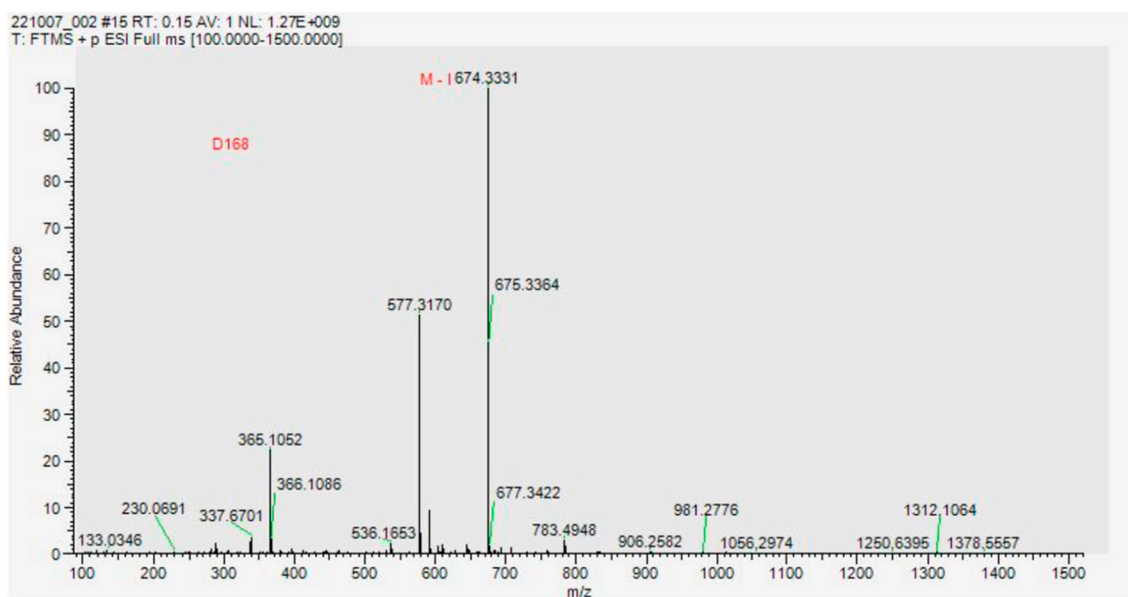

Figure S25 Mass spectrum of 15.

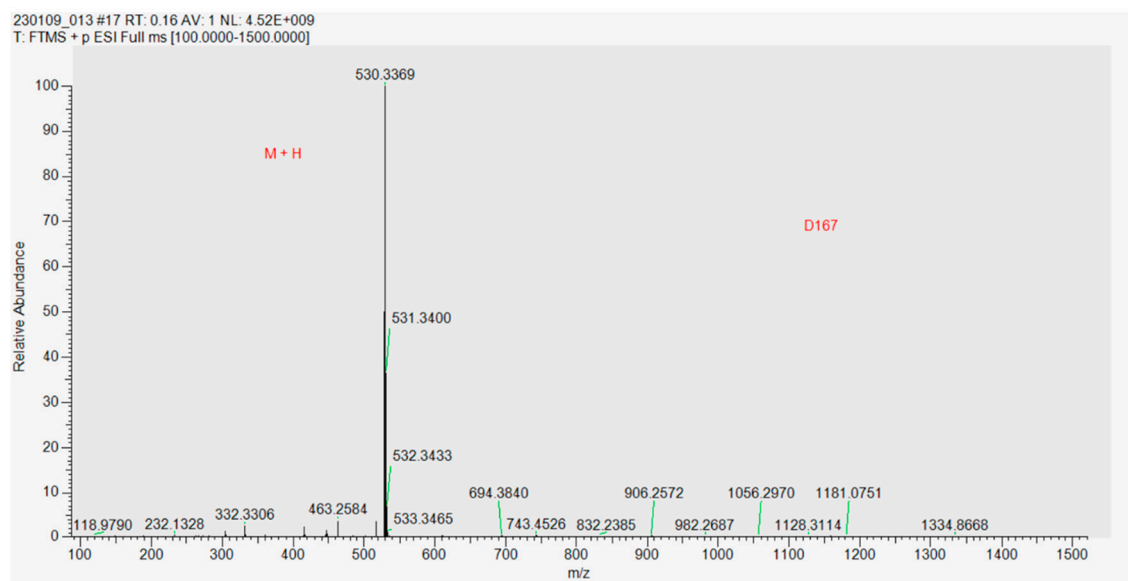

Figure S26 Mass spectrum of 18.

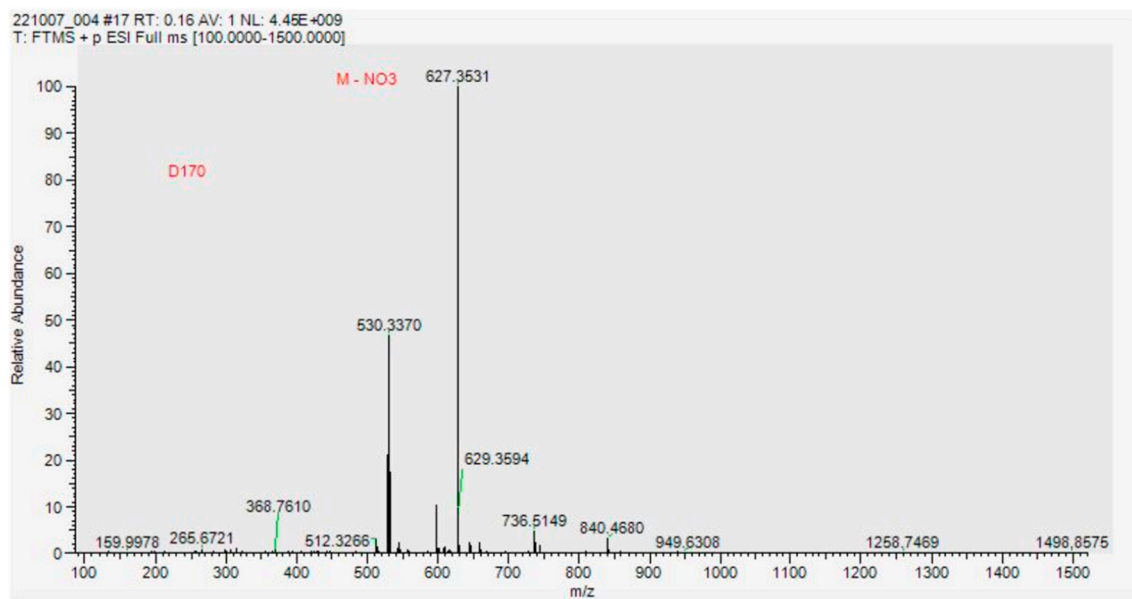

**Figure S27** Mass spectrum of **20**.

### 3. Quantum chemical calculations

**Table S1.** Calculated absorption data of the lowest energy transition of selected derivatives.

| Compound  |                       | Wavelength (nm) | $f$   | Composition                    | $\Delta r$ (Å) |
|-----------|-----------------------|-----------------|-------|--------------------------------|----------------|
| <b>8</b>  | $S_0 \rightarrow S_1$ | 507.6           | 0.637 | HOMO- $\rightarrow$ LUMO (99%) | 2.287          |
|           | $S_0 \rightarrow S_2$ | 455.9           | 1.352 | H-1- $\rightarrow$ LUMO (99%)  | 1.609          |
| <b>9</b>  | $S_0 \rightarrow S_1$ | 543.6           | 1.467 | HOMO- $\rightarrow$ LUMO (98%) | 3.753          |
|           | $S_0 \rightarrow S_2$ | 495.2           | 0.709 | H-1- $\rightarrow$ LUMO (99%)  | 3.048          |
| <b>14</b> | $S_0 \rightarrow S_1$ | 563.1           | 0.929 | HOMO- $\rightarrow$ LUMO (98%) | 1.682          |
|           | $S_0 \rightarrow S_2$ | 485.5           | 1.372 | H-1- $\rightarrow$ LUMO (97%)  | 3.249          |
| <b>15</b> | $S_0 \rightarrow S_1$ | 599.1           | 1.747 | HOMO- $\rightarrow$ LUMO (93%) | 4.373          |
|           | $S_0 \rightarrow S_2$ | 535.6           | 0.689 | H-1- $\rightarrow$ LUMO (94%)  | 2.402          |
| <b>19</b> | $S_0 \rightarrow S_1$ | 467.3           | 0.772 | HOMO- $\rightarrow$ LUMO (97%) | 8.836          |
|           | $S_0 \rightarrow S_2$ | 434.8           | 1.166 | H-1- $\rightarrow$ LUMO (97%)  | 4.706          |
| <b>20</b> | $S_0 \rightarrow S_1$ | 525.3           | 1.546 | HOMO- $\rightarrow$ LUMO (98%) | 4.045          |
|           | $S_0 \rightarrow S_2$ | 456.8           | 0.518 | H-1- $\rightarrow$ LUMO (98%)  | 3.694          |

**Table S2.** Selected bond distances (Å), dihedral angle (°) and BLA (Å) of the compounds in the ground  $S_0$  and excited  $S_1$  states.

| Compound  | $r[10-18]$ |       | $r[18-37]$ |       | $r[37-39]$ |       | BLA   |       | D[3-10-18-37] |       |
|-----------|------------|-------|------------|-------|------------|-------|-------|-------|---------------|-------|
|           | $S_0$      | $S_1$ | $S_0$      | $S_1$ | $S_0$      | $S_1$ | $S_0$ | $S_1$ | $S_0$         | $S_1$ |
| <b>8</b>  | 1.450      | 1.405 | 1.353      | 1.383 | 1.451      | 1.436 | 0.10  | 0.04  | 18.9          | 0.7   |
| <b>9</b>  | 1.442      | 1.417 | 1.359      | 1.385 | 1.440      | 1.430 | 0.08  | 0.04  | 12.6          | 0.1   |
| <b>14</b> | 1.447      | 1.416 | 1.355      | 1.375 | 1.448      | 1.439 | 0.09  | 0.05  | 15.5          | 1.4   |
| <b>15</b> | 1.438      | 1.426 | 1.362      | 1.377 | 1.437      | 1.433 | 0.08  | 0.05  | 8.4           | 1.8   |
| <b>19</b> | 1.449      | 1.408 | 1.353      | 1.383 | 1.449      | 1.436 | 0.10  | 0.04  | 19.9          | 3.6   |
| <b>20</b> | 1.441      | 1.430 | 1.360      | 1.377 | 1.439      | 1.439 | 0.08  | 0.06  | 15.4          | 7.4   |

**Table S3.** Calculated emission data of the lowest energy transition of selected derivatives.

| Compound  |                       | Wavelength (nm) | $f$   | Composition                    | $\tau$ (ns) |
|-----------|-----------------------|-----------------|-------|--------------------------------|-------------|
| <b>8</b>  | $S_1 \rightarrow S_0$ | 576.2           | 0.546 | HOMO- $\rightarrow$ LUMO (99%) | 9.11        |
| <b>9</b>  | $S_1 \rightarrow S_0$ | 583.2           | 1.543 | HOMO- $\rightarrow$ LUMO (99%) | 3.30        |
| <b>14</b> | $S_1 \rightarrow S_0$ | 602.8           | 0.877 | HOMO- $\rightarrow$ LUMO (98%) | 6.21        |
| <b>15</b> | $S_1 \rightarrow S_0$ | 623.0           | 1.850 | HOMO- $\rightarrow$ LUMO (95%) | 3.14        |
| <b>19</b> | $S_1 \rightarrow S_0$ | 522.7           | 0.702 | HOMO- $\rightarrow$ LUMO (98%) | 5.83        |
| <b>20</b> | $S_1 \rightarrow S_0$ | 560.2           | 1.678 | HOMO- $\rightarrow$ LUMO (99%) | 2.80        |

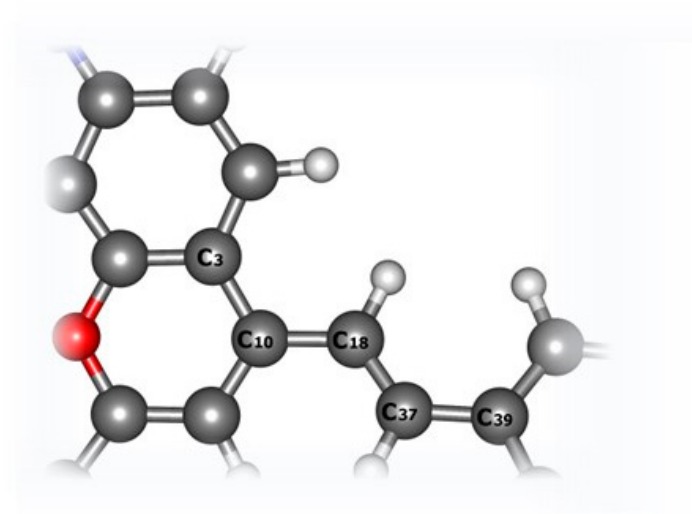

**Figure S28** Numbering scheme adopted to all fluorescent dyes.
